# Supplementary material
Source: HighWire-hosted journal article supplement (doi:10.1101/rna.073635.119)
Supplement: Supplemental_Information.pdf [file Supplemental_Information.pdf]

## Supplementary Information

### Method

CLEAR-CLIP. Mouse keratinocytes of the designated genotype were maintained in E-low calcium medium. Inducible cells were treated with 3 ug/ml final concentration doxycycline for 24 hours before performing CLEAR-CLIP. One 15cm dish of confluent cells was used per sample. Cells were washed once with cold PBS. 10mls of cold PBS was then added and cells were irradiated with 300mJ/cm<sup>2</sup> UVC (254nm wavelength). Cells were then scraped from the plates in cold PBS and pelleted by centrifugation at 1,000g for 2 minutes. Pellets were frozen at -80°C until needed. Cells were then lysed on ice with occasional vortexing in 1ml of lysis buffer (50mM Tris-HCl pH 7.4, 100mM NaCl, 1mM MgCl<sub>2</sub>, 0.1 mM CaCl<sub>2</sub>, 1% NP-40, 0.5% Sodium Deoxycholate, 0.1% SDS) containing 1X protease inhibitors (Roche #88665) and RNaseOUT (Invitrogen #10777019) at 4ul/ml final concentration. Next, TurboDNase (Invitrogen #AM2238, 10U), RNase A (0.13ug) and RNase T1 (0.13U) were added and samples were incubated at 37°C for 5 minutes with occasional mixing. Samples were immediately placed on ice and then centrifuged at 16,160g at 4°C for 20 minutes to clear lysate. 25ul of Protein-G Dynabeads (Invitrogen #10004D) were used per IP. Dynabeads were pre-washed with lysis buffer and pre-incubated with 3ul of Wako Anti-Mouse-Ago2 (2D4) antibody. The dynabead/antibody mixture was added to the lysate and rocked for 2 hours at 4°C. All steps after the IP were done on bead until samples were loaded into the polyacrylamide gel. Beads were captured on a magnetic stand and the supernatant removed, then washed 3 times with cold High Salt Clip Wash Buffer (50mM Tris-HCl pH 7.4, 1M NaCl, 1mM EDTA, 1% NP-40, 0.5% sodium deoxycholate, 0.1% SDS) for 3 minutes with rocking. Samples were then washed 2 times with PNK wash buffer (20mM Tris-HCl pH 7.4, 10mM MgCl<sub>2</sub>, 0.2% Tween-20). Samples were then phosphorylated at 37°C for 20 minutes in 50ul of PNK mixture: 41.8ul H<sub>2</sub>O, 5 ul 10X PNK buffer (NEB), 1 ul RNaseOUT, 1.67 ul ATP (30 mM), 0.5 ul T4 PNK - 3' phosphatase minus (NEB M0236L). Samples were then washed 3 times on a magnetic rack with PNK wash buffer. miRNA-mRNA

ligation was then carried out overnight at room temperature in 100ul of mixture: 49.25 ul H<sub>2</sub>O, 30 ul 50% PEG-8000 (NEB #B1004) 10 ul 10X T4 RNA ligation buffer (NEB), 2.5 ul RNaseOUT, 1 ul ATP (100mM), 1 ul BSA (10 mg/ml), 6.25 ul T4 RNA ligase 1 (10U/ul – NEB M0204). Next morning, an additional 2.5 ul T4 RNA ligase 1 (10U/ul) and 1 ul ATP (100mM) were added and ligation was continued for another 5 hours. Samples were then washed 2 times with lysis buffer, once with PNK/EDTA/EGTA (50 mM Tris pH 7.4, 10 mM EDTA, 10 mM EGTA, 0.5% Igepal) and twice more with PNK wash buffer. Next, samples were treated with phosphatase at 37°C for 20 minutes with 50ul of mix: 41ul H<sub>2</sub>O, 5ul 10X FastAP buffer, 3ul FastAP enzyme (Thermo Fisher #EF0651) and 1ul RNaseOUT. Samples were then washed two times with PNK wash buffer. Next, 3' adapter ligation was performed on beads overnight in 40 ul of mixture: 17ul H<sub>2</sub>O, 4ul 10X T4 RNA ligation buffer (NEB), 1ul of 3'linker (5'-Adenylated & 3' blocked - custom ordered from IDT), 16ul 50% PEG-8000, 1 ul RNaseOUT and 1ul T4 RNA ligase 2 truncated K227Q (NEB M0351). Samples were then washed twice with PNK buffer. Next, samples were then radiolabeled on bead with 50ul of the following mix: 5 ul 10X PNK buffer (NEB), 1 ul RNaseOUT, 1.5 ul  $\gamma$ -p<sup>32</sup>-ATP (15 $\mu$ Ci), 1 ul PNK enzyme (NEB M0201) and 41.5 ul H<sub>2</sub>O. Radiolabeling was carried out for 5 minutes at 37°C, after which another 2 ul of cold ATP (10mM) was added and the samples were then incubated for another 5 minutes at 37°C. Samples were then washed three times with PNK buffer, and then re-suspended in 25 ul of 1.2X LDS NuPAGE Loading buffer (Thermo Fisher #NP0007) with 60 mM DTT added. Samples were then heated to 70°C for 10 minutes with occasional agitation and supernatant was separated from beads on a magnetic stand. Samples were loaded on an 8% Bis-Tris gel and run at 200V for 2 hours on ice. Protein-RNA complexes were then transferred to a nitrocellulose membrane at 90V for 90min. The membrane was washed with PBS and exposed to a phosphoscreen for 1 hour at -20°C. Fragments corresponding to the Argonaute complex with the miRNA & mRNA (~110 kDa to 160 kDa) were then excised and RNA was isolated by following the protocol published for irClip (Zarnegar et al. 2016): 15 ul of Proteinase K (Thermo

scientific EO0491) at 20 mg/ml was added to 285 ul of Proteinase K/SDS buffer (100 mM Tris-HCl pH 7.5, 50 mM NaCl, 1 mM EDTA, 0.2% SDS). This solution was heated to 37°C for 20 minutes to inactivate any RNases, added to nitrocellulose membrane fragments and incubated at 50°C for 1 hour. Samples were briefly centrifuged and then 375 ul of saturated phenol/choloform/isoamyl alcohol (25:24:1) was added and incubated for 10 minutes at 37°C. Samples were then centrifuged at 16,000g at room temperature for 3 minutes, the aqueous layer was removed to a new tube and precipitated overnight at -20°C with 2 ul Glycoblue (ThermoFisher #AM9516) and 900 ul of 100% ethanol. RNA was pelleted by centrifugation at 16,160g at 4°C for 20 minutes and the supernatant removed. Pellet was washed with 70% ethanol and left to air dry at room temperature for 5 minutes. Next, 5' adapters were ligated by adding 8ul of the following mix to the pellet and thoroughly resuspending: 2 ul 50% PEG-8000, 1ul 10X NEB RNA ligation buffer, 1 ul 10mM ATP, 4 ul H<sub>2</sub>O. Samples were then heated briefly to 95°C, placed on ice and additional components were added: 0.5 ul RNaseOUT, 1 ul T4 RNA ligase 1 (10U/ul – NEB M0204), 0.5 ul 100 uM 5' RNA linker (Blocked at 5' end & NNNN at 3' end for bias reduction and barcoding). Ligation was carried out at 37°C for 4 hours with rocking. RT-PCR was then carried out in ligation buffer by adding 8.5 ul of the following mix to the sample: 4 ul 5X first-strand buffer (Invitrogen), 1.5 ul 100mM DTT, 2ul 1 uM RT primer, 1 ul 10mM dNTPs. Samples were heated to 65°C for 5 minutes, transferred to a PCR tube and then enzymes were added: 1 ul Superscript III (Thermo Fisher #18080093) and 0.5 ul RNaseOUT. RT reaction was then performed in a thermocycler: 50°C for 1 hour, 85°C for 5 minutes, and then hold at 4°C. Libraries were then amplified from the cDNA by PCR taking aliquots after cycles 12, 17 and 22. PCR mix: 18.8 ul H<sub>2</sub>O, 8 ul 5X HF buffer (NEB), 1 ul 25 uM library 1<sup>st</sup> round forward primer, 1 ul 25 uM RT primer, 0.8 ul 10 mM dNTPs, 0.4 ul Phusion polymerase (NEB M0530) and 10 ul cDNA. Cycling parameters: Initial denaturation at 98°C for 30 seconds and then amplification cycles at 98°C for 15 seconds, 56°C for 30 seconds and then 72°C for 20 seconds. PCR products were run on a 9% acrylamide gel and then stained with SYBR gold

(ThermoFisher #211494) at 1:10,000 for 10 minutes. The area corresponding to approximately 73 to 150 base pairs was excised from the lowest cycles condition that showed a product. Gel pieces were then frozen at -80°C for one hour and centrifuged through a hole in the tube made with a 20G needle to break up the gel. 350 ul HSCB buffer (25 mM Tris-HCl pH 7.5, 400 mM NaCl, 0.1% SDS) was added and samples were then rocked overnight at 4°C. The next day the gel slurry was transferred to a 0.22 um filter tube and spun at 16,000g for 20 minutes at room temperature. Samples were then precipitated overnight at -20°C in the presence of 1 ml 100% ethanol and 2ul Glycoblue. The next day samples were centrifuged at 16,160g at 4°C for 20 minutes. The pellet was washed with 70% ethanol and then air dried for 5 minutes. The pellet was then resuspended in 20 ul of H<sub>2</sub>O. Next, high throughput sequencing barcodes were added by PCR using the following mix: 10 ul previous PCR product, 3.84 ul H<sub>2</sub>O, 4 ul 5X HF buffer, 0.66 ul 10mM dNTPs, 0.5 ul 25 uM Illumina Index Primer, 0.5 ul 25 uM Illumina RP1 primer and 0.5 ul Phusion. Cycling conditions: Initial Denaturation at 98°C for 30 seconds, 2 cycles of: 98°C for 15 seconds, 50°C for 20 seconds, 72°C for 45 seconds and then 4 cycles of: 98°C for 15 seconds and 72°C for 50 seconds and then a final extension at 72°C for 3 minutes. PCR products were then run on a 9% acrylamide gel and stained with SYBR gold as above. Products corresponding to sizes approximately 144-200 base pairs were excised and isolated from the gel as above. Libraries were mixed in equal amounts and sequenced on an Illumina HiSeq 4000 by the Microarray and Genomics Core at the University of Colorado Anschutz Medical Campus. Primers and adapters used for CLEAR-CLIP were published previously(17).

### **Supplemental Figure Legend**

**Figure S1. Characterization of CLEAR-CLIP results.** A, Sequence diagram of murine members of the miR-200 family showing the two related seed sequences and conservation in the 3' end. B, qPCR validation of RNA used for RNA-seq showing miRNA levels after miR-200b

cluster induction. Shown as the average of biological triplicates +/- the standard deviation. C, qPCR validation of RNA used for RNA-seq showing miR-205 level after miR-205 induction. Shown as the average of biological triplicates +/- the standard deviation. D, Log2 fold change in gene expression following miR-200b cluster induction of genes found only in CLEAR-CLIP, only in HITS-CLIP or found in both. Only CLEAR-CLIP genes with a seed (6mer or better) were used since HITS-CLIP requires a seed for determining targets. E, Log2 fold change in gene expression upon miR-205 induction of genes found only in CLEAR-CLIP (with a seed), only in HITS-CLIP or found in both. F, Log2 fold change in gene expression following miR-200b cluster induction of genes that had a CLEAR-CLIP area in only one gene area (3'UTR, 5'UTR, CDS or Intron). Panels D, E & F: Number of genes are shown in parenthesis for each group and p-values were calculated using the Kolmogorov–Smirnov test. G, miR-200 high confidence areas were annotated to the genome and searched for motifs (6mer, 7merA1, 7merM8 and 8mer). The percent of motifs observed is shown for each annotation category as a stacked bar graph. H, Overlap of miR-200 members within individual areas is shown and whether the overlap was within or across seed type families. I, High confidence areas calculated for each miR-200 member individually (as in figure 1H) were searched for their cognate motif (6mer, 7merA1, 7merM8 and 8mer). The percentage of areas with each motif is shown for each miR-200 member (non-motif areas were excluded). J, Full table of miR-200 GO term clustering is shown, including GO categories that were only observed for one miR-200 family member.

**Figure S2. Characterization of CLEAR-CLIP by gene expression level and highly targeted genes without motifs.**

A, miR-200 high confidence areas that were found only in control samples, only in inducible samples or in both were searched for motifs - 6mers, 7mers (7merM8 or 7merA1) and 8mers. The percent of areas with each motif is shown as a stacked bar graph for each category. B, The

basemean from our RNA-seq is shown as a violin plot for genes with miR-200 high confidence areas found only in control samples, only in inducible samples or in both samples. P-values were calculated using the Kolmogorov–Smirnov test. C, Log<sub>2</sub> gene expression levels are shown for genes with CLEAR-CLIP reads from miRNAs other than miR-200s that were found to be derepressed or not upon induction of the miR-200b cluster. D, The log<sub>2</sub> number of CLEAR-CLIP reads is shown for genes with CLEAR-CLIP reads from miRNAs other than miR-200s that were found to be derepressed or not upon induction of the miR-200b cluster. P-values for panels C & D were calculated using an unpaired two-sided t-test. E, 3'UTR areas are shown as examples of genes highly targeted by miR-200s that do not have a miR-200 motif within CLEAR-CLIP areas and that are not repressed upon induction of miR-200s. All CLEAR-CLIP reads are shown for each gene on the top row. miR-200 specific CLEAR-CLIP reads are then shown in descending order: Control, miR-200 DKO and miR-200 induced libraries. Scales for each track are shown in the upper left of each box. miR-200 motifs (if present) are shown on the bottom with an arrow.

**Figure S3. Characterization of the miR-205 motif and targeted ncRNAs.** A, The top motif found by HOMER is shown for miR-205 CLEAR-CLIP areas that did not have a 6mer or better canonical motif. The reverse complement of miR-205 is shown below the motif with the seed underlined. B, Examples of non-coding RNAs that were found to be targeted by miR-200s are shown for control, miR-200 DKO and miR-200 Tg samples. Fold change data upon induction of the miR-200b cluster is also shown below for important non-coding RNAs. C, The distance from each miR-200 CLEAR-CLIP site to the 3' end of non-coding RNAs was calculated and shown here as a histogram for non-coding RNAs that were found to be repressed (>0.1 Log<sub>2</sub> fold change) upon miR-200b cluster induction (effective) or not (ineffective). The x axis has been clipped at 20,000 for clarity.

**Figure S4. Gene repression by the number of CLEAR-CLIP areas per gene and gene expression of areas found by CLEAR-CLIP or TargetScan.** A, Log2 fold change in gene expression levels upon induction of the miR-200b cluster are shown for genes with 1, 2, 3 or 4+ miR-200 CLEAR-CLIP areas. B, Log2 fold change in gene expression levels upon induction of the miR-200b cluster are shown for genes with 1, 2 or 3+ miR-200 CLEAR-CLIP areas with a miR-200 seed. C, Log2 fold change in gene expression levels upon induction of miR-205 are shown for genes with 1, 2 or 3+ miR-205 CLEAR-CLIP areas. Panels A, B & C: The number of genes in each group are shown in parenthesis and p-values were calculated using the Kolmogorov–Smirnov test. D, Log2 gene expression levels as measured by RNA-seq are shown for miR-200 and miR-205 targets that were found only in CLEAR-CLIP, only by TargetScan or found in both.

**Figure S5. Global miRNA targeting analysis.** Hierarchical clustering of top is shown for miRNAs based on their CLEAR-CLIP gene targets. Blue indicates that a gene was targeted by a miRNA and white indicates no targeting.

**Table S1. List of samples used for CLEAR-CLIP.** Table contains the sample type, experiment, the number of sequencing reads and number of CLEAR-CLIP reads.

**Table S2. Full table showing GO term results for miRNAs that are heavily targeted.** The table shows the GO term, the overlap, significance and the genes within the GO term.

# Supplemental figure 1. Further characterization of CLEAR-CLIP results

## A

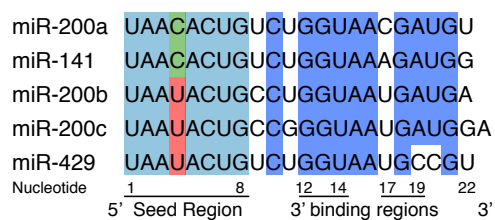

## B

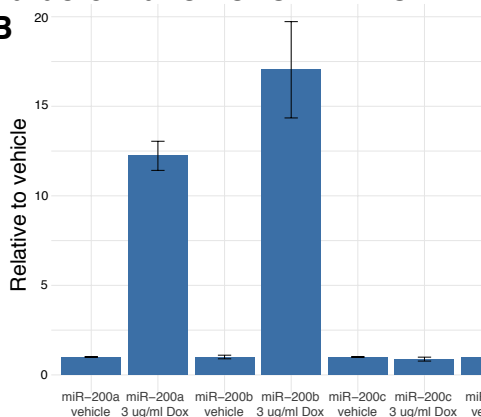

## C

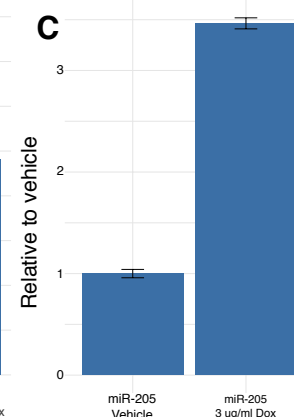

## D

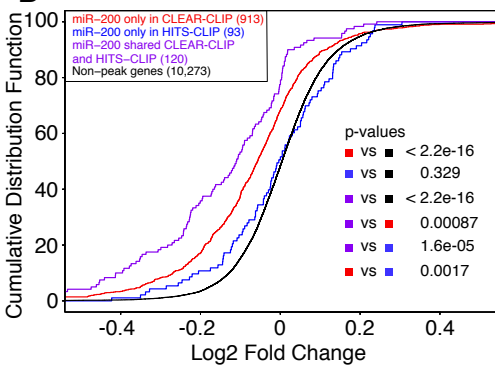

## E

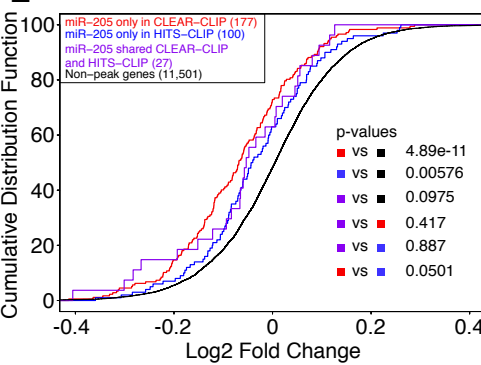

## F

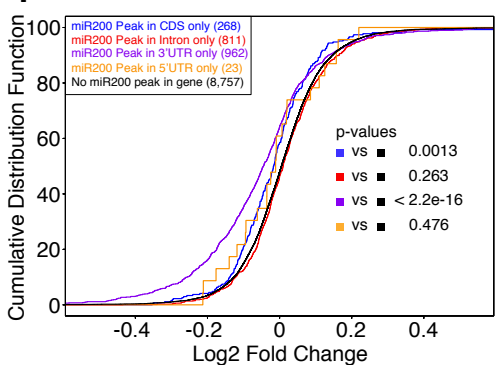

## G

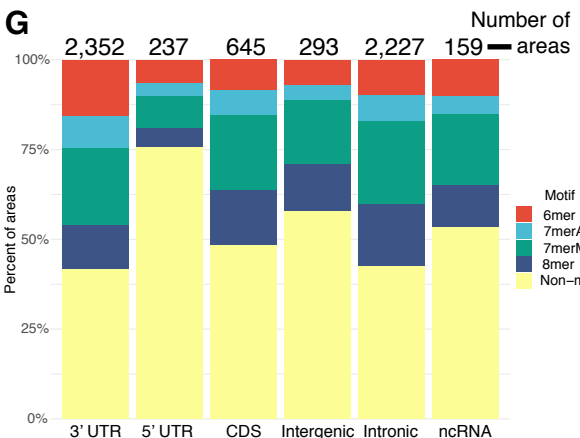

## H

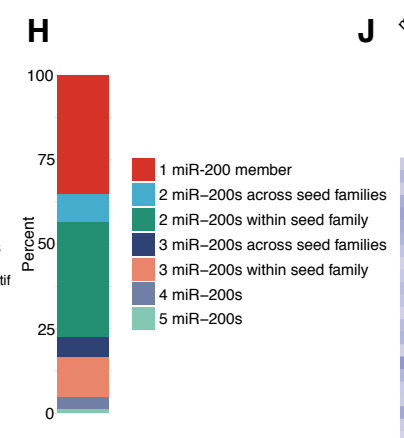

## J

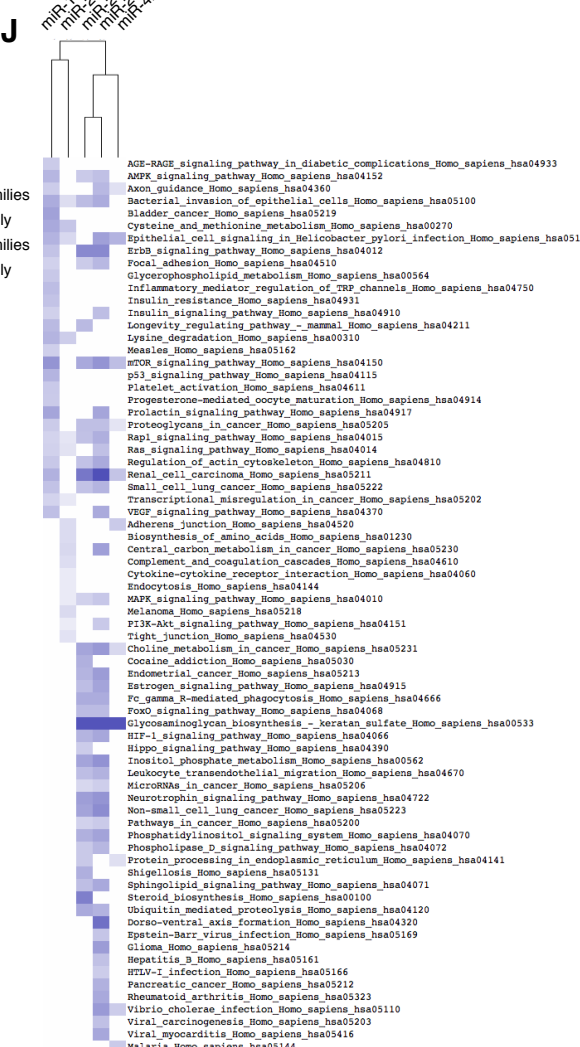

## I

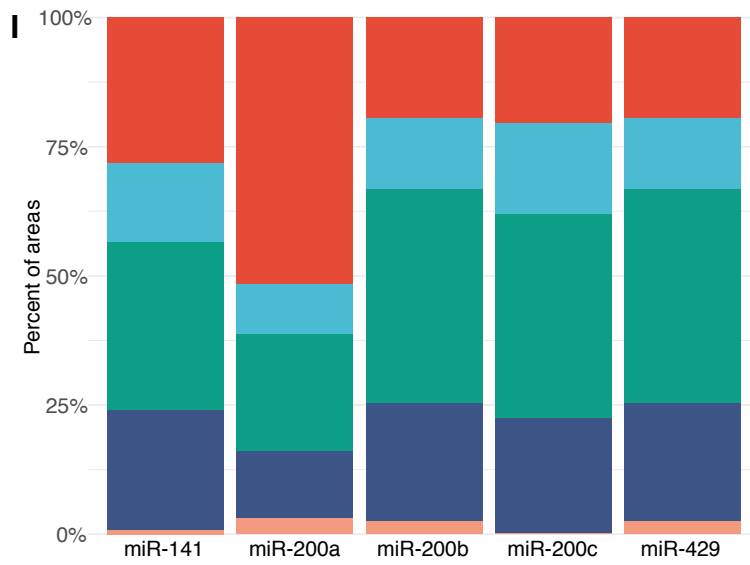

**A**

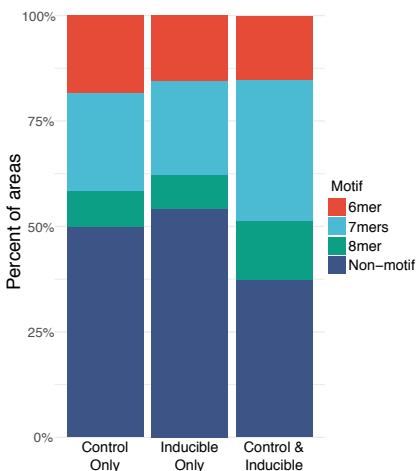

**B**

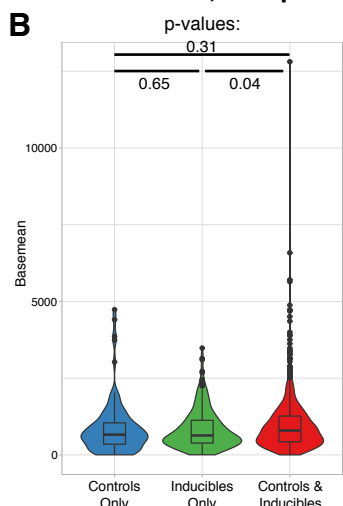

**C**

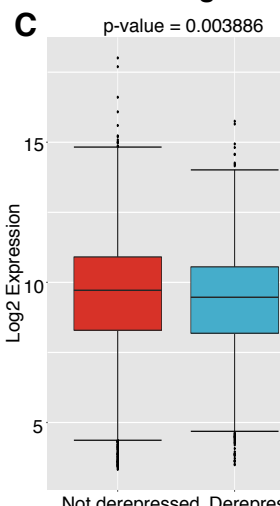

**D**

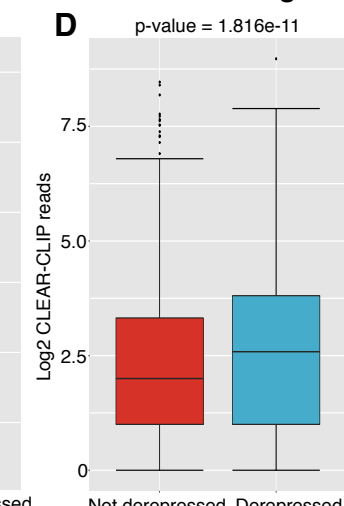

**E**

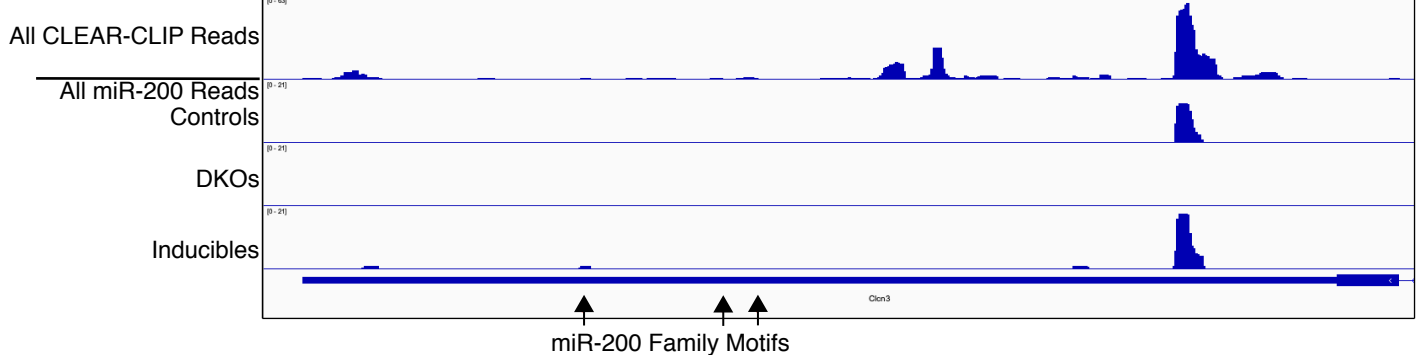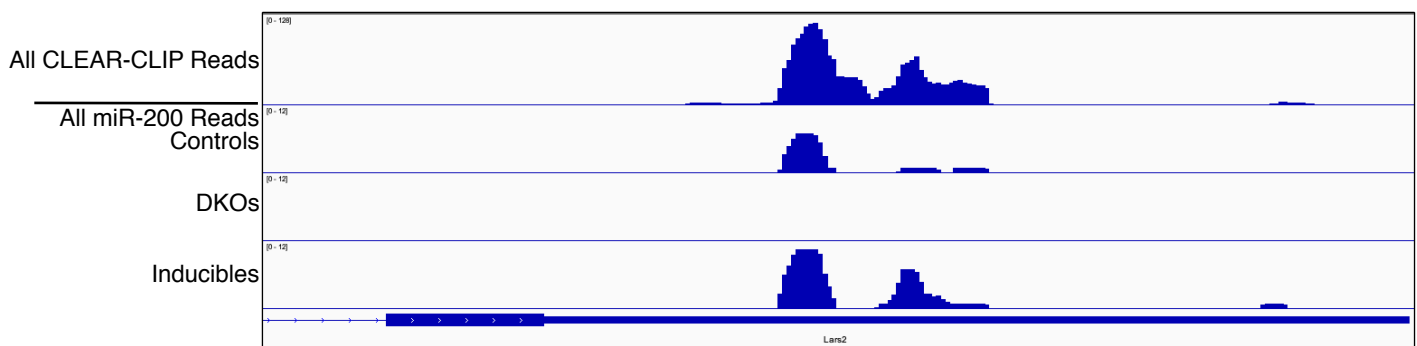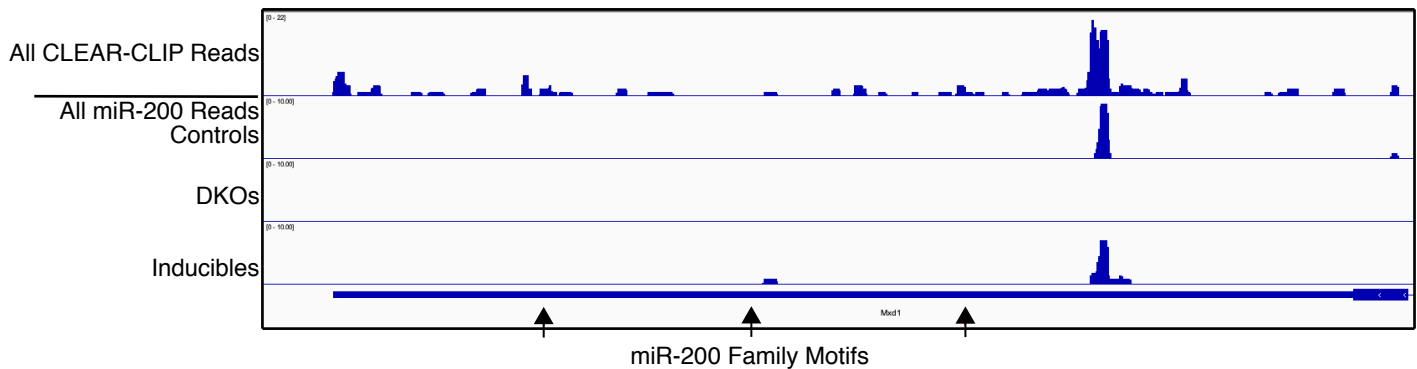

# Supplemental figure 3. Further miR-205 motif characterization and examples of targeted ncRNAs

**A**

| Motif                                                                            | P-value | log P-value | % of Targets | % of Background |
|----------------------------------------------------------------------------------|---------|-------------|--------------|-----------------|
|  | 1e-415  | -9.557e+02  | 21.79%       | 3.45%           |

CAGACUCCGGUGGAAUGAAGGA miR-205 Reverse Complement

**B**

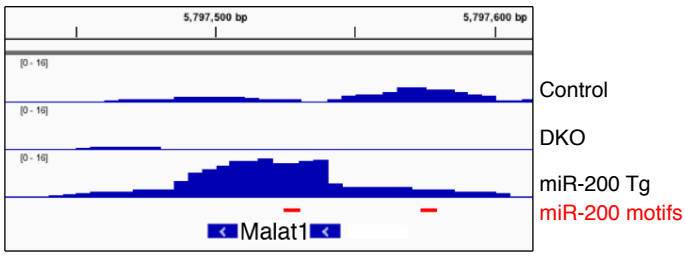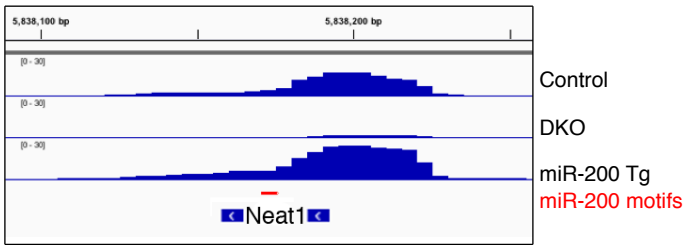

| Log2 Fold Change |       |
|------------------|-------|
| Malat1           | -0.24 |
| Neat1            | -0.12 |
| Tug1             | -0.04 |
| Gas5             | -0.05 |
| Firre            | -0.03 |

**C**

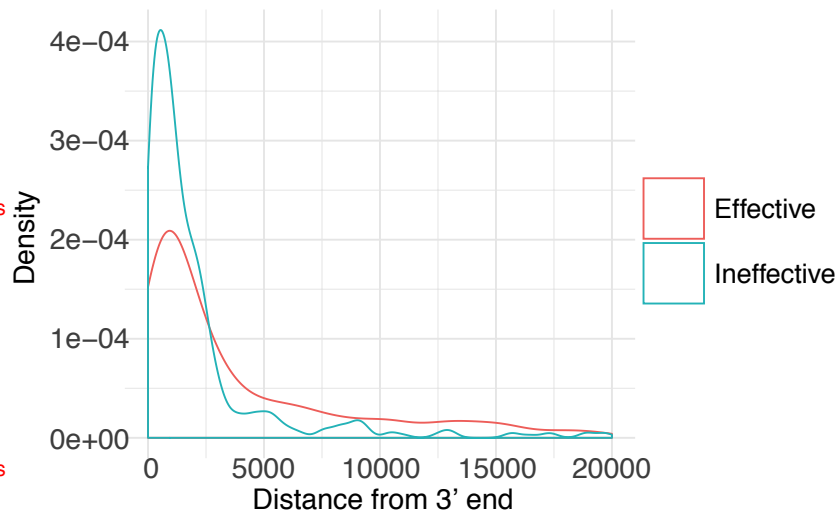



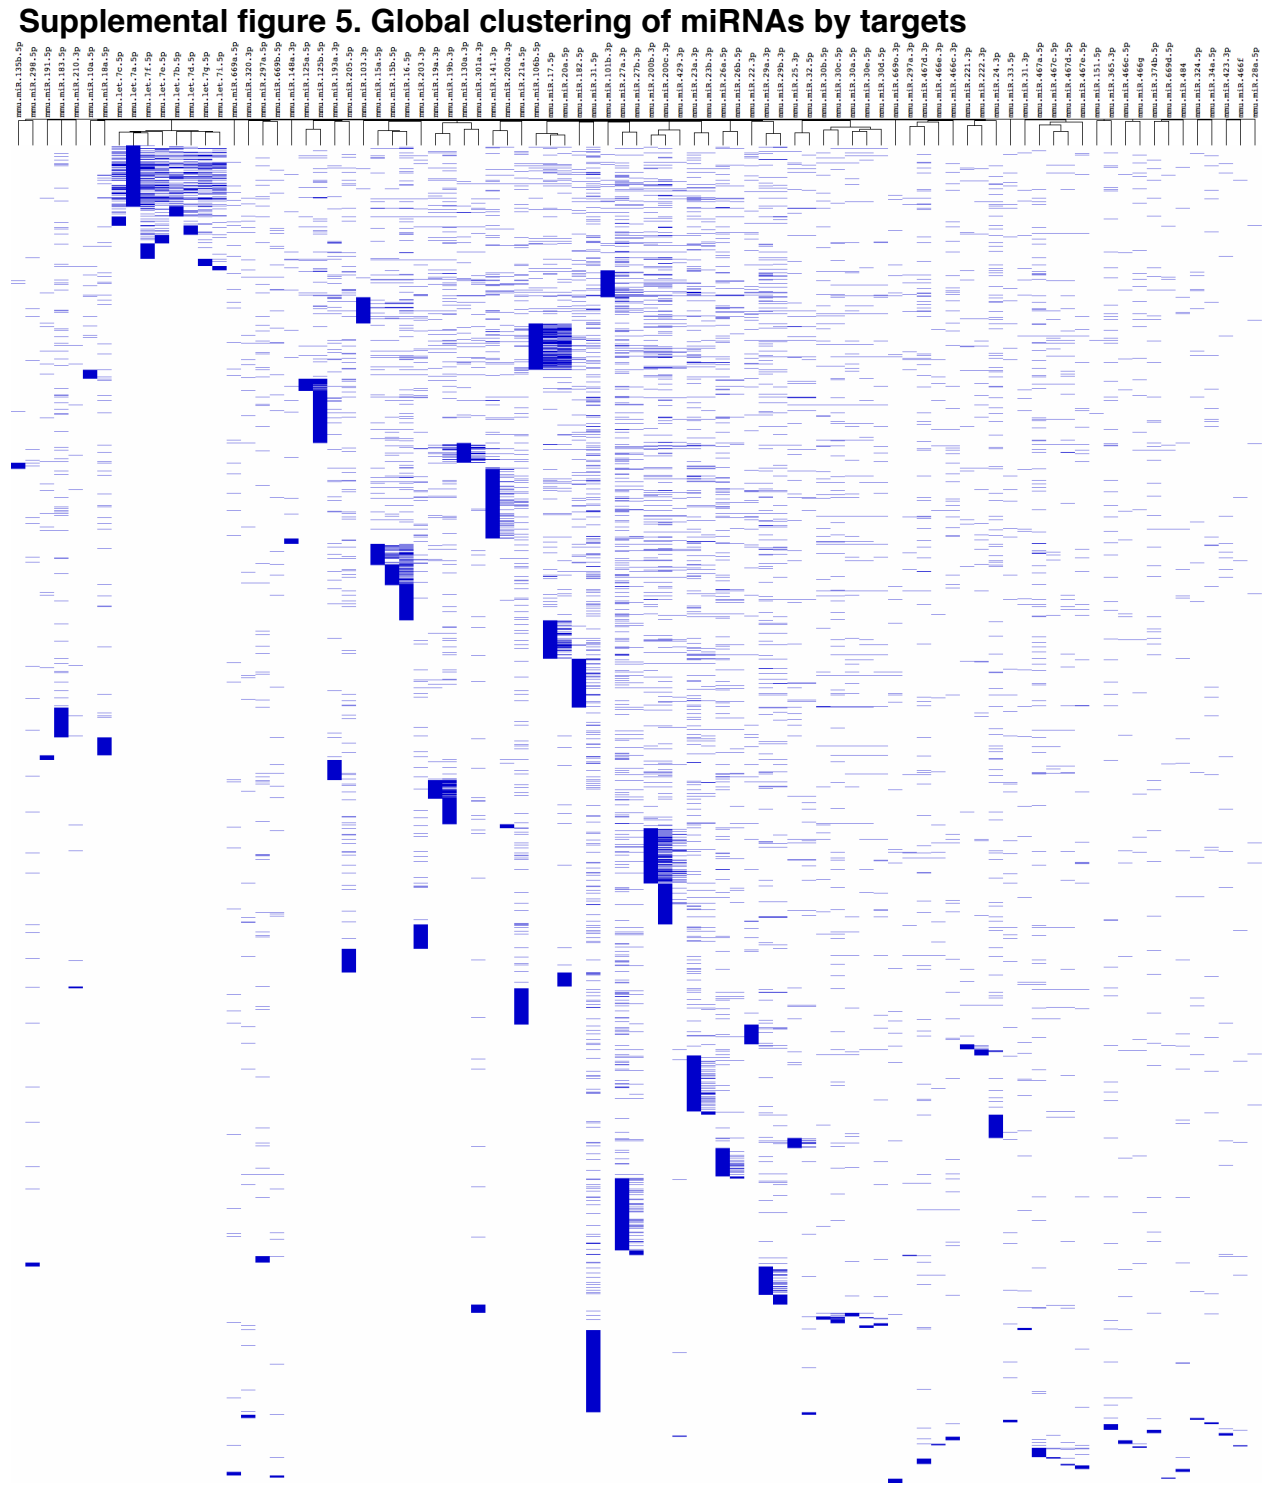

**Supplementary Table 1. Samples used for CLEAR-CLIP**

| Sample                                                | Type          | Experiment | Total sequencing reads | Number of unique CLEAR-CLIP reads |
|-------------------------------------------------------|---------------|------------|------------------------|-----------------------------------|
| K14-Cre keratinocytes (Control)                       | Control 1     | Group 1    | 28,951,235             | 22,394                            |
| K14-Cre keratinocytes (Control)                       | Control 2     | Group 1    | 69,562,643             | 19,308                            |
| K14-Cre keratinocytes (Control)                       | Control 3     | Group 1    | 58,490,875             | 36,400                            |
| K14-Cre keratinocytes (Control)                       | Control 4     | Group 1    | 36,321,840             | 37,567                            |
| K14-Cre keratinocytes (Control)                       | Control 5     | Group 1    | 32,850,327             | 33,594                            |
| K14-Cre keratinocytes (Control)                       | Control 6     | Group 1    | 47,737,230             | 33,483                            |
| miR-200 DKO keratinocytes                             | miR-200 DKO 1 | Group 1    | 36,217,636             | 23,204                            |
| miR-200 DKO keratinocytes                             | miR-200 DKO 2 | Group 1    | 19,825,464             | 16,620                            |
| miR-200 DKO keratinocytes                             | miR-200 DKO 3 | Group 1    | 26,394,791             | 11,596                            |
| miR-200b cluster inducible keratinocytes (Un-induced) | Control 1     | Group 2    | 39,414,925             | 57,279                            |
| miR-200b cluster inducible keratinocytes (Un-induced) | Control 2     | Group 2    | 41,967,583             | 143,874                           |
| miR-200b cluster inducible keratinocytes (Un-induced) | Control 3     | Group 2    | 35,724,788             | 127,034                           |
| miR-200b cluster inducible keratinocytes              | Inducible 1   | Group 2    | 41,895,809             | 147,001                           |
| miR-200b cluster inducible keratinocytes              | Inducible 2   | Group 2    | 69,418,670             | 150,488                           |
| miR-200b cluster inducible keratinocytes              | Inducible 3   | Group 2    | 24,074,912             | 152,936                           |
| miR-200 DKO keratinocytes                             | miR-200 DKO 1 | Group 2    | 51,932,214             | 79,810                            |
| miR-200 DKO keratinocytes                             | miR-200 DKO 2 | Group 2    | 27,092,199             | 103,480                           |
| miR-200 DKO keratinocytes                             | miR-200 DKO 3 | Group 2    | 30,629,688             | 33,951                            |
|                                                       |               |            |                        |                                   |
|                                                       |               | Total      | 718,502,829            | 1,230,019                         |

## Supplementary Table 2. GO terms associated with miRNA targets

| Term                                                                           | Overlap | P-value     | Adjusted P-value | Old P-value | Old Adjusted P-value | Z-score      | Combined Score | Genes                                                                                                                                                                                                                                                                                                                                                                                             |
|--------------------------------------------------------------------------------|---------|-------------|------------------|-------------|----------------------|--------------|----------------|---------------------------------------------------------------------------------------------------------------------------------------------------------------------------------------------------------------------------------------------------------------------------------------------------------------------------------------------------------------------------------------------------|
| Proteoglycans in cancer_Homo sapiens_hsa05205                                  | 54/203  | 2.234E-17   | 5.51799E-15      | 5.16123E-11 | 1.27482E-08          | -2.013336866 | 77.19163974    | ITGB1;CDKN1A;CBLB;PIK3CB;ACTB;IGF1R;PPP1CB;CCND1;CTSL;PLAU;MYC;ITGAV;ARHGFE12;PPP1R12A;PDPK1;GAB1;PLAUR;RRAS2;FRS2;HSPG2;TIAM1;CTNNB1;PIK3CA;ITGA5;EZR;MET;CD44;HBEFG;DDX5;SDCA4;ROCK2;SRC;PIK3R1;IQGAP1;HIF1A;THBS1;EGFR;CDC42;NRAS;MAPK1;PLCG1;SMAD2;CAV2;CAV1;FZD6;RDX;WNT7A;MSN;BRAF;VEGFA;RPS6KB1;MDM2;SDC1;CTNNB1                                                                           |
| Focal adhesion_Homo sapiens_hsa04510                                           | 47/202  | 5.89789E-13 | 4.86156E-11      | 3.62364E-08 | 2.98346E-06          | -1.896682124 | 53.41376404    | ITGB1;GSK3B;ROCK2;SRC;LAMA3;PTEN;XIAP;LAMC2;PIK3R1;PIK3CB;LAMC1;THBS1;ACTB;EGFR;CRKL;IGF1R;RAP1B;PPP1CB;CDC42;CCND3;MAPK8;CCND2;CCND1;CAPN2;PAK6;MAPK1;ITGAV;ITGB6;PAK2;JUN;PPP1R12A;CAV2;ITGA3;PDPK1;ACTN1;CAV1;BRAF;VEGFA;COL4A2;PIK3CA;COL4A1;CTNNB1;ITGA6;ITGA5;CRK;MET;VCL                                                                                                                   |
| Adherens junction_Homo sapiens_hsa04520                                        | 27/74   | 5.90472E-13 | 4.86156E-11      | 2.10495E-08 | 2.59962E-06          | -1.80359470  | 50.78535563    | SRC;CTNNND1;PTPRJ;IQGAP1;WASL;NLK;MLLT4;PTPRF;EGFR;ACTB;IGF1R;CDC42;CDH1;MAPK1;SMAD2;ACTN1;INSR;TGFBFR1;TGFBFR2;TJP1;SNAI2;CTNNB1;PVRL4;PVRL2;MET;PVRL1;VCL                                                                                                                                                                                                                                       |
| FoxO signaling pathway_Homo sapiens_hsa04068                                   | 36/133  | 2.71921E-11 | 1.34329E-10      | 6.57695E-08 | 3.57372E-06          | -1.724599199 | 45.92724875    | CDKN1A;CDKN1B;FOXG1;SETD7;PTEN;PIK3R1;PIK3CB;FOXO3;NLK;STK4;EGFR;IGF1R;NRAS;MAPK8;BCL2L1;CCND2;CCND1;MAPK1;SMAD2;PLK3;HOMER1;CHUK;PDPK1;INSR;PLK2;BRAF;FBXO32;TGFBFR1;TGFBFR2;PIK3CA;BCL6;CCNG2;CDK2;MDM2;ATM;SGK3                                                                                                                                                                                |
| Hippo signaling pathway_Homo sapiens_hsa04390                                  | 39/153  | 2.6664E-12  | 1.34329E-10      | 7.23425E-08 | 3.57372E-06          | -1.664311085 | 44.3543769     | YAP1;YWHAE;GSK3B;BMPR2;YWHAB;SERPINE1;PPP2R2A;ACTB;CTGF;PPP1CB;PPP2CB;PARD6B;CCND3;CCND2;CCND1;CDH1;MYC;TEAD1;YWHAG;SMAD2;TEAD4;YWTR1;PRKCI;FBXW11;FZD6;WNT7A;CSNK1D;YWHAZ;TGFBFR1;SMAD7;TGFBFR2;MOB1B;LATS1;DLG1;LATS2;SNAI2;CTNNB1;AJUBA;BMPR1A                                                                                                                                                 |
| Regulation of actin cytoskeleton_Homo sapiens_hsa04810                         | 46/214  | 1.97943E-11 | 6.98455E-10      | 3.74286E-07 | 1.15561E-05          | -1.772519354 | 43.68485414    | ITGB1;NCKAP1;ROCK2;SRC;ARPC1A;PIK3R1;IQGAP1;WASL;PIK3CB;ACTB;EGFR;CRKL;PPP1CB;CDC42;NRAS;FLN2;PAK6;MAPK1;PIP4K2B;ITGAV;ITGB6;PAK2;ARHGFE12;PPP1R12A;ITGA3;ACTN1;LIMK1;NRAS;RRAS2;MSN;BRAF;GNG12;SH2;ENAH;TIAM1;DIAPH2;PIKFYVE;PIK3CA;MYH9;ITGA6;ITGA5;PFN1;EZR;CRK;VCL;FGFR2                                                                                                                      |
| Protein processing in endoplasmic reticulum_Homo sapiens_hsa04141              | 40/169  | 1.75587E-11 | 6.98455E-10      | 2.65583E-07 | 9.37173E-06          | -1.694934096 | 41.97583829    | TRAM1;SEC23A;RPN2;PRKCSH;SEL1L;CUL1;DERL1;HSP90B1;UBE2J1;ERO1L;SEC61A2;ATXN3;MAPK8;GANAB;HSPH1;MAN1A2;LMAN2;CAPN2;SSR1;SEC63;PDIA3;EDEM3;HSPA8;SEC24A;HSPA5;EDEM1;SSR2;SSR3;SYVN1;MOGS;YOD1;UBE2G1;MARCKB;PDIAB;CKAP4;DNAJC5;CANX;ERP29;YHOU1;NFE2L2                                                                                                                                              |
| p53 signaling pathway_Homo sapiens_hsa04115                                    | 24/69   | 3.69495E-11 | 1.14082E-09      | 2.65595E-07 | 9.37173E-06          | -1.529528901 | 36.74153062    | CDKN1A;RRM2;APAF1;E2F4;IGFBP3;SERPINE1;PTEN;TNFRSF10B;PPM1D;THBS1;SERPINB5;CCND3;CDD6;CCND2;CCND1;ZMAT3;CCNG2;PERP;CCNG1;CDK2;MDM2;PMAIP1;ATM;MDM4                                                                                                                                                                                                                                                |
| Pathways in cancer_Homo sapiens_hsa05200                                       | 67/397  | 7.07619E-11 | 1.94202E-09      | 2.28425E-06 | 4.86568E-05          | -1.896231922 | 44.31816407    | ITGB1;GSK3B;CDKN1A;CDKN1B;PTEN;SLC2A1;CBLB;LAMC2;PIK3CB;LAMC1;CRKL;IGF1R;CCND1;CDH1;MYC;ITGAV;ARHGFE12;CHUK;ITGA3;FOS;TGFBFR1;RUNX1;TGFBFR2;COL4A2;PIK3CA;COL4A1;TRAF6;IKK;CRK;MET;ROCK2;LAMA3;GNAI3;PAR2;TGFA;XIAP;PIK3R1;PTGS2;STK4;HIF1A;ADCY6;EGFR;HSP90B1;CDC42;NRAS;MAPK8;E2F2;MAPK1;E2F3;PLCG1;SMAD2;JUN;EGLN3;JUP;FZD6;WNT7A;BRAF;GNG12;VEGFA;CDK6;LPA6;CDK2;CCDC6;MDM2;GNA3;CTNNB1;FGFR2 |
| Bacterial invasion of epithelial cells_Homo sapiens_hsa05100                   | 25/78   | 1.10566E-10 | 2.73098E-09      | 5.33366E-07 | 1.46371E-05          | -1.510833424 | 34.63647268    | ITGB1;SRC;ARPC1A;CLTC;CBLB;PIK3CB;PIK3R1;WASL;LACTB;CRKL;CDC42;CDH1;SEPT11;CAV2;CAV1;GAB1;SEPT2;CD2AP;PIK3CA;CTTN;CTNNB1;ITGA5;CRK;MET;VCL                                                                                                                                                                                                                                                        |
| ErbB signaling pathway_Homo sapiens_hsa04012                                   | 26/87   | 2.68955E-10 | 6.03927E-09      | 9.62207E-07 | 2.37665E-05          | -1.60286839  | 35.32157063    | GSK3B;CDKN1A;CDKN1B;SRC;TGFA;CBLB;PIK3CB;PIK3R1;EGFR;HSP90B1;IGF1R;NRAS;MAPK8;MYC;PAK6;ABL2;MAPK1;PLCG1;PAK2;JUN;GAB1;BRAF;EREG;PIK3CA;RPS6KB1;CRK;HBEFG                                                                                                                                                                                                                                          |
| PI3K-Akt signaling pathway_Homo sapiens_hsa04151                               | 59/341  | 3.59601E-10 | 7.40178E-09      | 4.87208E-06 | 8.0227E-05           | -1.781845463 | 38.74806006    | YWHAE;ITGB1;ATF2;GSK3B;CDKN1A;CDKN1B;YWHAB;PTEN;LAMC2;PPP2R2A;PIK3CB;LAMC1;IGF1R;CCND3;CCND2;CCND1;MYC;CREB3L2;ITGAV;ITGB6;YWHAG;CHUK;ITGA3;PDPK1;YWHAZ;CREB1;COL4A2;PIK3CA;COL4A1;DDIT4;SGK3;ITGA6;ITGA5;MET;EPHA2;JFNAR1;PHLPP2;LAMA3;LPA2;PIK3R1;EFNA5;FOXO3;THBS1;EGFR;HSP90B1;PPP2CB;NRAS;BCL2L1;MAPK1;MCL1;INSR;GNG12;VEGFA;CDK6;RPS6KB1;LPA6;CDK2;MDM2;FGFR2                               |
| Small cell lung cancer_Homo sapiens_hsa05222                                   | 25/86   | 1.12994E-09 | 2.14689E-08      | 2.36389E-06 | 4.86568E-05          | -1.51033928  | 31.11465026    | ITGB1;CDKN1B;LAMA3;PTEN;XIAP;LAMC2;PIK3CB;LAMC1;PIK3R1;PTGS2;CCND1;MYC;E2F2;E2F3;ITGAV;APAF1;CHUK;ITGA3;CDK6;PIK3CA;COL4A2;COL4A1;TRAF6;CDK2;ITGA6                                                                                                                                                                                                                                                |
| Prostate cancer_Homo sapiens_hsa05215                                          | 25/89   | 2.49022E-09 | 4.28831E-08      | 3.95279E-06 | 7.5103E-05           | -1.590800867 | 31.51519173    | GSK3B;CDKN1A;CDKN1B;PTEN;TGFA;PIK3CB;PIK3R1;EGFR;HSP90B1;IGF1R;NRAS;CCND1;CREB3L2;E2F2;MAPK1;E2F3;CHUK;PDPK1;BRAF;CREB1;PIK3CA;CDK2;MDM2;CTNNB1;FGFR2                                                                                                                                                                                                                                             |
| MicrRNAs in cancer_Homo sapiens_hsa05206                                       | 52/297  | 2.60423E-09 | 4.28831E-08      | 1.36979E-05 | 0.000211461          | -1.570451519 | 31.0417446     | CDKN1A;CDKN1B;BMPR2;PTEN;GLS;CRKL;CCND2;CCND1;PLAU;MYC;PIM1;TPM1;DNMT3A;KIF23;DICER1;SERPINB5;CDC25A;CDC25B;FOXO1;PIK3CA;DDIT4;FSCN1;ITGA5;EZR;CRK;MET;CD44;NOTCH2;NOTCH1;PTGS2;SLC7A1;THBS1;EGFR;NRAS;BCL2L1;IGFBP1;E2F2;HMBOX1;MAPK1;E2F3;PLCG1;MCL1;RDX;HMGA2;VEGFA;MARCKS;CDK6;CCNG1;MDM2;SPRY2;ATM;MDM4                                                                                      |
| Renal cell carcinoma_Homo sapiens_hsa05211                                     | 21/66   | 3.94345E-09 | 6.0877E-08       | 4.756E-06   | 8.0227E-05           | -1.382324    | 26.74964095    | JUN;EGLN3;GAB1;SLC2A1;TGFA;BRAF;PIK3CB;PIK3R1;HIF1A;VEGFA;CRKL;RAP1B;CDC42;FLCN;NRAS;PIK3CA;PAK6;MAPK1;PAK2;CRK;MET                                                                                                                                                                                                                                                                               |
| Endocytosis_Homo sapiens_hsa04144                                              | 46/259  | 1.35428E-08 | 1.96769E-07      | 3.19314E-05 | 0.000415109          | -1.568879463 | 28.42403297    | RAB3C;TRFC;SRC;ARPC1A;CLTC;CBLB;ADRB2;WASL;RAB22A;EGFR;IGF1R;EEA1;CDC42;CYTH3;PARD6B;RAB11FIP1;KIF5B;EP515;LDLR;SNX5;SMAD2;ARFGEF1;HSPA8;PRKCI;PDCD6IP;STI1;CAV2;CAV1;ARAP2;VPS37A;VPS37B;IGF2R;TGFBFR1;TGFBFR2;EHDL;RAB10;ZFYVE16;NEED4;TRAF6;CAPZA2;CHMP4C;MDM2;MET;FGFR2;ARF6;SPG20                                                                                                            |
| MAPK signaling pathway_Homo sapiens_hsa04010                                   | 45/255  | 2.37278E-08 | 3.25598E-07      | 4.46397E-05 | 0.000501182          | -1.564972331 | 27.47562316    | ATF2;ZAK;NLK;STK4;DUSP16;EGFR;CRKL;ELK4;RAP1B;CDC42;PPP3CA;RPS6KA3;NRAS;MAPK8;MYC;MNK2;MAPK1;PAK2;MAP3K2;MAP2K3;HSPA8;JUN;MAPK31;CHUK;DUSP1;RRAS2;BRAF;FOS;GNG12;DUSP8;TGFBFR1;DUSP7;CDC25B;TGFBFR2;IL1A;TAOK1;TRAF6;RASA1;MAPKAPK2;RASA2;NF1;RAPGEF2;TAB2;CRK;FGFR2                                                                                                                              |
| Chronic myeloid leukemia_Homo sapiens_hsa05220                                 | 21/73   | 2.93371E-08 | 3.81383E-07      | 1.72682E-05 | 0.000250896          | -1.348210794 | 23.38392388    | CDKN1A;CDKN1B;CHUK;BRAF;CBLB;PIK3CB;PIK3R1;TGFBFR1;RUNX1;TGFBFR2;CRKL;NRAS;CDK6;PIK3CA;CCND1;MYC;MDM2;E2F2;MAPK1;E2F3;CRK                                                                                                                                                                                                                                                                         |
| TNF signaling pathway_Homo sapiens_hsa04668                                    | 26/110  | 6.08046E-08 | 7.50937E-07      | 3.42556E-05 | 0.000422984          | -1.40386524  | 23.31312479    | ATF2;TNFAIP3;CXCL1;NOD2;PIK3R1;PIK3CB;CXCL3;PTGS2;CXCL5;MAPK8;CREB3L2;MAPK1;JUNB;MAP2K3;EDN1;JUN;JAG1;CHUK;LIF;DAB2IP;CLAR;FOS;CREB1;PIK3CA;TAB3;TAB2                                                                                                                                                                                                                                             |
| Bladder cancer_Homo sapiens_hsa05219                                           | 15/41   | 8.04703E-08 | 9.46484E-07      | 2.91535E-05 | 0.00040005           | -0.891028564 | 14.55528805    | CDKN1A;SRC;BRAF;THBS1;EGFR;VEGFA;NRAS;CCND1;CDH1;MYC;MDM2;E2F2;MAPK1;E2F3;HBEFG;ITGB1;CHUK;FBXW11;ROCK2;SRC;ARPC1A;NOD2;WASL;ACTB;CRKL;CDC42;MAPK8;CTTN;MAPK1;ITGA5;PFN1;CRK;VCL;CD44                                                                                                                                                                                                             |
| Shigellosis_Homo sapiens_hsa05131                                              | 19/65   | 1.0021E-07  | 1.12508E-06      | 3.59622E-05 | 0.000422984          | -0.984198069 | 15.86133438    | ITGB1;SRC;CTNNND1;GNAI3;LPA2;PIK3R1;PIK3CB;EFNA5;MLLT4;THBS1;ADCY6;ACTB;EGFR;CRKL;IGF1R;RAP1B;CDC42;PARD6B;NRAS;CDH1;MAPK1;PLCG1;MAP2K3;PRKCI;INSR;BRAF;VEGFA;TIAM1;PIK3CA;ADORA2B;GNA3;RAPGEF2;CTNNB1;PFN1;CRK;MET;FGFR2;EPHA2                                                                                                                                                                   |
| Rap1 signaling pathway_Homo sapiens_hsa04015                                   | 38/211  | 1.66939E-07 | 1.79278E-06      | 0.000121014 | 0.001153385          | -1.408555998 | 21.98141249    | ATF2;CDKN1A;DDX3X;CDKN1B;YWHAB;SRC;PTEN;PIK3R1;PIK3CB;NRAS;MAPK8;CCND1;MYC;CREB3L2;E2F2;MAPK1;E2F3;JUN;MAP3K1;APAF1;CHUK;FOS;HSPG2;YWHAZ;TGFBFR1;CREB1;CDK6;PIK3CA;CDK2;JFNAR1                                                                                                                                                                                                                    |
| Hepatitis B_Homo sapiens_hsa05161                                              | 30/146  | 1.74367E-07 | 1.79453E-06      | 8.45482E-05 | 0.000907974          | -1.350119213 | 21.01069258    | XIAP;PIK3R1;PIK3CB;ACTB;LMNB1;NRAS;MAPK8;BCL2L1;CTSL;CAPN2;PMAIP1;CASP2;MAPK1;CTSD;SPTAN1;CTSC;CTSB;MCL1;JUN;APAF1;CHUK;PDPK1;DAB2IP;TNFRSF10B;CLAR;FOS;PTPN13;PIK3CA;ATM                                                                                                                                                                                                                         |
| AGE-RAGE signaling pathway in diabetic complications_Homo sapiens_hsa04933     | 23/101  | 7.04872E-07 | 6.44827E-06      | 0.000155094 | 0.00141882           | -1.31837144  | 18.67506123    | SMAD2;EDN1;JUN;CDKN1B;SERPINE1;PIK3R1;PIK3CB;F3;TGFBFR1;TGFBFR2;VEGFA;CDC42;IL1A;THBD;NRAS;MAPK8;CCND1;PIK3CA;COL4A2;COL4A1;PIM1;MAPK1;PLCG1                                                                                                                                                                                                                                                      |
| Pancreatic cancer_Homo sapiens_hsa05212                                        | 18/66   | 6.80538E-07 | 6.44827E-06      | 0.000121409 | 0.001153385          | -1.087114109 | 15.43743639    | SMAD2;CHUK;TGFA;BRAF;PIK3CB;PIK3R1;TGFBFR1;EGFR;TGFBFR2;VEGFA;CDC42;MAPK8;CDK6;PIK3CA;CCND1;E2F2;MAPK1;E2F3                                                                                                                                                                                                                                                                                       |
| Axon guidance_Homo sapiens_hsa04360                                            | 26/127  | 1.21888E-06 | 1.07522E-05      | 0.000260526 | 0.002115869          | -1.082876274 | 14.74615607    | ITGB1;GSK3B;NRP1;SEMA3C;ROCK2;GNAI3;EFNA5;CDC42;PPP3CA;NRAS;ABLUM1;CFL2;PAK6;PLXNA1;MAPK1;PAK2;EPHA4;ARHGFE12;SEMA4D;SEMA4B;LIMK2;SEMA4C;RASA1;EPHA1;MET;EPHA2;PDPK1;TGFA;BRAF;PIK3CB;PIK3R1;FOXO3;STK4;EGFR;NRAS;CDK6;PIK3CA;CCND1;E2F2;MAPK1;E2F3;PLCG1                                                                                                                                         |
| Non-small cell lung cancer_Homo sapiens_hsa05223                               | 16/56   | 1.4266E-06  | 1.21507E-05      | 0.000183281 | 0.001616797          | -0.911760645 | 12.27249335    | ACVR1;SMAD2;TGIF1;BMPR2;FST;CUL1;ACVR1B;THBS1;TGFBFR1;ACVR2A;TGFBFR2;SMAD7;PPP2CB;ZFYVE16;RPS6KB1;SP1;MYC;MAPK1;E2F5;BMPR1A                                                                                                                                                                                                                                                                       |
| TGF-beta signaling pathway_Homo sapiens_hsa04350                               | 20/84   | 1.75931E-06 | 1.4485E-05       | 0.000249208 | 0.002115869          | -0.995769726 | 13.19453293    | DDX5;CDKN1A;CCNT2;CDKN1B;KMT2A;DOT1L;JMJD1C;IGF1R;ELK4;H0XA9;CCND2;PLAU;MYC;NFKBIZ;WHS1;JUP;H3F3B;FUS;IGFBP3;HMGA2;KLF3;PBX1;RUNX1;TGFBFR2;GOLPH3;SPINT1;BCL6;SP1;BMP2K;MDM2;ATM;MET                                                                                                                                                                                                              |
| Transcriptional misregulation in cancer_Homo sapiens_hsa05202                  | 32/180  | 2.05816E-06 | 1.63989E-05      | 0.000500675 | 0.003637259          | -1.043074923 | 13.65771029    | CDKN1A;PTEN;TGFA;BRAF;PIK3CB;PIK3R1;EGFR;IGF1R;NRAS;CDK6;PIK3CA;CCND1;MDM2;E2F2;MAPK1;E2F3;PLCG1                                                                                                                                                                                                                                                                                                  |
| Glioma_Homo sapiens_hsa05214                                                   | 17/65   | 2.61056E-06 | 1.98705E-05      | 0.000283674 | 0.002189605          | -0.929807675 | 11.95355757    | GSK3B;PDPK1;PTEN;BRAF;PIK3CB;PIK3R1;FOXO3;EGFR;NRAS;PIK3CA;CCND1;CDH1;MYC;CTNNB1;MAPK1                                                                                                                                                                                                                                                                                                            |
| Endometrial cancer_Homo sapiens_hsa05213                                       | 15/52   | 2.65476E-06 | 1.98705E-05      | 0.000265554 | 0.002115869          | -0.632105033 | 8.1156985849   | GSK3B;BMPR2;RIF1;PIK3R1;PIK3CB;ACVR1B;IGF1R;NRAS;MYC;SMARCAD1;MAPK1;SKL1;ACVR1;SMAD2;ZFXH3;PCGF3;FZD6;LIF;WNT7A;KLF4;ACVR2A;REST;PIK3CA;CTNNB1;JL6ST;FGFR2;BMPR1A                                                                                                                                                                                                                                 |
| Signaling pathways regulating pluripotency of stem cells_Homo sapiens_hsa04550 | 27/142  | 3.42522E-06 | 2.46384E-05      | 0.000553718 | 0.003907667          | -1.005649004 | 12.65543484    | GSK3B;BMPR2;RIF1;PIK3R1;PIK3CB;ACVR1B;IGF1R;NRAS;MYC;SMARCAD1;MAPK1;SKL1;ACVR1;SMAD2;ZFXH3;PCGF3;FZD6;LIF;WNT7A;KLF4;ACVR2A;REST;PIK3CA;CTNNB1;JL6ST;FGFR2;BMPR1A                                                                                                                                                                                                                                 |

|                                                                                  |        |             |             |             |             |              |              |                                                                                                                                                                                                                                        |
|----------------------------------------------------------------------------------|--------|-------------|-------------|-------------|-------------|--------------|--------------|----------------------------------------------------------------------------------------------------------------------------------------------------------------------------------------------------------------------------------------|
| Thyroid hormone signaling pathway_Homo sapiens_hsa04919                          | 24/118 | 3.49127E-06 | 2.46384E-05 | 0.000482611 | 0.003612273 | -0.949245146 | 11.9274983   | PFKFB2;NOTCH2;MED1;GSK3B;NOTCH1;PDPK1;SRC;SLC2A1;ATP1B3;PIK3R1;PIK3CB;HIF1A;ACTB;ME D13;NRAS;MED13;CCND1;PIK3CA;MYC;MDM2;CTNNB1;MAPK1;ITGAV;PLCG1                                                                                      |
| HTLV-1 infection_Homo sapiens_hsa05166                                           | 40/258 | 4.27833E-06 | 2.93541E-05 | 0.001191918 | 0.007355539 | -1.068700316 | 13.2112168   | ATF2;NRP1;GSK3B;CDKN1A;SLC2A1;XIAP;PIK3R1;PIK3CB;ADCY6;ETS2;ELK4;PPP3CA;NRAS;CCND3;ZF P36;MAPK8;CCND2;CCND1;MYC;CDK27;E2F2;E2F3;MYBL1;SMAD2;JUN;MAP3K1;CHUK;FZD6;RRAS2; WNT7A;FOS;TGFBF1;TGFBF2;DLG1;CREB1;PIK3CA;CANX;TBP1;CTNNB1;ATM |
| Cell cycle_Homo sapiens_hsa04110                                                 | 24/124 | 8.57441E-06 | 5.724E-05   | 0.000890643 | 0.005945647 | -0.823124878 | 9.603174245  | SMAD2;YWHAE;GSK3B;CDKN1A;CDKN1B;YWHAH;CUL1;YWHAZ;CDC25A;CDC25B;CCND3;WEE1;CCN D2;CDK6;CCND1;MYC;CDK27;CDK2;MDM2;E2F2;E2F3;ATM;E2F5;YWHAH                                                                                               |
| Melanoma_Homo sapiens_hsa05218                                                   | 17/71  | 9.54266E-06 | 6.20273E-05 | 0.000675097 | 0.004631913 | -0.698982624 | 8.080056076  | CDKN1A;PTEN;BRAF;PIK3CB;PIK3R1;EGFR;IGF1R;NRAS;CDK6;PIK3CA;CCND1;CDH1;MDM2;E2F2;MA PK1;E2F3;MET                                                                                                                                        |
| Viral carcinogenesis_Homo sapiens_hsa05203                                       | 33/205 | 1.29978E-05 | 8.23195E-05 | 0.001831958 | 0.010283946 | -1.015692047 | 11.4272763   | YWHAH;ATF2;CDKN1A;CDKN1B;DDX3X;YWHAH;SRC;UBE3A;CHD4;PIK3R1;PIK3CB;CDC42;NRAS;CCND 3;CCND2;CCND1;CREB3L2;PMAIP1;MAPK1;YWHAH;JUN;ACTN1;YWHAZ;DLG1;CREB1;CDK6;PIK3CA; MAPKAPK2;RASA2;CDK2;MDM2;TBP1;IL6ST                                 |
| Neurotrophin signaling pathway_Homo sapiens_hsa04722                             | 23/120 | 1.54871E-05 | 9.56329E-05 | 0.001267687 | 0.007455209 | -0.849623447 | 9.410006902  | YWHAH;GSK3B;JUN;MAP3K1;PDPK1;GAB1;FRS2;BRAF;PIK3R1;PIK3CB;FOXO3;CRKL;RAP1B;CDC42;R PS6KA3;NRAS;MAPK8;PIK3CA;TRAF6;MAPKAPK2;MAPK1;PLCG1;CRK                                                                                             |
| mTOR signaling pathway_Homo sapiens_hsa04150                                     | 15/60  | 1.81443E-05 | 0.000109309 | 0.00094126  | 0.006156317 | -0.455271233 | 4.970264956  | CAB39;PDPK1;PTEN;BRAF;PIK3CB;PIK3R1;HIF1A;VEGFA;RPS6KA3;PIK3CA;RPS6KB1;DDIT4;MAPK1;UL K1;RICTOR                                                                                                                                        |
| ECM-receptor interaction_Homo sapiens_hsa04512                                   | 18/82  | 1.90777E-05 | 0.000112195 | 0.001133166 | 0.007176717 | -0.466859551 | 5.073357179  | ITGB1;SDC4;ITGA3;LAMA3;LAMC2;LAMC1;HSPG2;THBS1;COL4A2;COL4A1;DAG1;SDC1;ITGA6;ITGAV; ITGA5;ITGB6;AGRN;CD44                                                                                                                              |
| Tight junction_Homo sapiens_hsa04530                                             | 25/139 | 2.12046E-05 | 0.000121803 | 0.001737595 | 0.00998107  | -0.697128336 | 7.50200094   | ZAK;SRC;PTEN;GNAI3;PPP2R2A;F11R;CLDN1;MLLT4;ACTB;CDC42;PPP2CB;NRAS;PAR6B;SPTAN1;PR KC1;ACTN1;SHROOM2;RRAS2;ASH1;TJP1;CLDN4;CTTN;MYH9;CTNNB1;AMOTL1                                                                                     |
| Colorectal cancer_Homo sapiens_hsa05210                                          | 15/62  | 2.76556E-05 | 0.000155249 | 0.001257245 | 0.007455209 | -0.310903293 | 3.263141886  | SMAD2;GSK3B;JUN;BRAF;PIK3CB;FOS;PIK3R1;TGFBF1;TGFBF2;MAPK8;PIK3CA;CCND1;MYC;CTNNB 1;MAPK1                                                                                                                                              |
| Ras signaling pathway_Homo sapiens_hsa04014                                      | 34/227 | 4.50103E-05 | 0.000241686 | 0.004412316 | 0.021796843 | -0.844630491 | 8.453584851  | RAB5C;PIK3R1;RASAL2;PIK3CB;EFNA5;STK4;MLLT4;EGFR;ETS2;JGFR1;RAP1B;CDC42;NRAS;MAPK8;P AK6;ABL2;MAPK1;PLCG1;PAK2;CHUK;INSR;GAB1;RRAS2;GNG12;VEGFA;TIAM1;PIK3CA;RASA1;RASA 2;NF1;MET;FGFR2;EPHA2;ARF6                                     |
| HIF-1 signaling pathway_Homo sapiens_hsa04066                                    | 20/103 | 4.48285E-05 | 0.000241686 | 0.002248832 | 0.012343588 | -0.659635777 | 6.604713046  | EDN1;EGLN3;CDKN1A;CDKN1B;TFR3;INSR;SERPINE1;SLC2A1;PIK3R1;PIK3CB;HIF1A;EGFR;IGF1R;VE GFA;PIK3CA;RPS6KB1;MKNK2;HMOX1;MAPK1;PLCG1                                                                                                        |
| Estrogen signaling pathway_Homo sapiens_hsa04915                                 | 19/99  | 8.12813E-05 | 0.000427159 | 0.003209835 | 0.016868709 | -0.628222941 | 5.916348659  | ATF2;HSP89A;JUN;SRC;GNAI3;PIK3R1;PIK3CB;FOS;EGFR;ADCY6;HSP90B1;NRAS;CREB1;PIK3CA;SP1;C REB3L2;GNAS;MAPK1;HBEFG                                                                                                                         |
| Epithelial cell signaling in Helicobacter pylori infection_Homo sapiens_hsa05120 | 15/68  | 8.7276E-05  | 0.000449108 | 0.002739822 | 0.014711654 | -0.215159169 | 2.010971242  | JUN;CHUK;SRC;ADAM10;CXCL1;F11R;EGFR;CDC42;TJP1;ADAM17;MAPK8;ATP6B1B2;PLCG1;MET;HB EGF                                                                                                                                                  |
| Salmonella infection_Homo sapiens_hsa05132                                       | 17/86  | 0.000129813 | 0.000654364 | 0.00398761  | 0.02028925  | -0.295727655 | 2.646589389  | JUN;ROCK2;ARPC1A;CXCL1;FOS;WASL;CXCL3;KLC1;ACTB;CDC42;TJP1;IL1A;DYNC1L1;MAPK8;MYH9; MAPK1;PFN1                                                                                                                                         |
| Acute myeloid leukemia_Homo sapiens_hsa05221                                     | 13/57  | 0.000178223 | 0.000880423 | 0.004024993 | 0.02028925  | -0.021571785 | 0.186217864  | JUP;CHUK;BRAF;PIK3CB;PIK3R1;RUNX1;NRAS;PIK3CA;CCND1;RPS6KB1;MYC;PIM1;MAPK1                                                                                                                                                             |
| Lysosome_Homo sapiens_hsa04142                                                   | 21/123 | 0.00020166  | 0.000976669 | 0.006620916 | 0.029733934 | -0.518521977 | 4.412064675  | CD164;ASAHI1;DUAA;CLTC;MGPR;GNS;JITAF;JGFR2;LAPTM4B;LAPTM4A;LAMP1;NPLC1;CTSL;AP1G1;LA MP2;PSAP;AP1S2;TPP1;CTSD;CTSC;CTSB                                                                                                               |
| Arrhythmogenic right ventricular cardiomyopathy (ARVC)_Homo sapiens_hsa05412     | 15/74  | 0.000237755 | 0.001129336 | 0.005438866 | 0.02534717  | -0.058784627 | 0.490514791  | DSP;ITGB1;JUP;ITGA3;ACTN1;ACTB;GJA1;DAG1;CTNNB1;DSG2;ITGA6;ITGAV;ITGA5;ITGB6;DS2                                                                                                                                                       |
| Central carbon metabolism in cancer_Homo sapiens_hsa05230                        | 14/67  | 0.000272531 | 0.001270099 | 0.005666994 | 0.025921249 | -0.096084779 | 0.788640488  | SLC2A1;PTEN;PIK3CB;PIK3R1;HIF1A;EGFR;GLS;SLC7A5;NRAS;PIK3CA;MYC;MAPK1;MET;FGFR2                                                                                                                                                        |
| Lysine degradation_Homo sapiens_hsa00310                                         | 12/52  | 0.000278771 | 0.001275118 | 0.005189081 | 0.024648136 | 0.410892387  | -3.363203724 | KMT2D;KMT2A;NSD1;KMT2C;DOT1L;SETD7;PLOC2;ASH1L;WHS1;COLGALT1;WHS1L1;SUVA420H1                                                                                                                                                          |
| Toxoplasmosis_Homo sapiens_hsa05145                                              | 20/118 | 0.000312631 | 0.001378926 | 0.008498571 | 0.035578764 | -0.399308865 | 3.222617007  | MAP2K3;ITGB1;HSP89A;CHUK;PDPK1;LAMA3;GNAI3;XIAP;LAMC2;PIK3R1;PIK3CB;LAMC1;MAPK8;PIK3 CA;TRAF6;PIF1;MAPK1;TAB2;ITGA6;LDLR                                                                                                               |
| Leukocyte transendothelial migration_Homo sapiens_hsa04670                       | 20/118 | 0.000312631 | 0.001378926 | 0.008498571 | 0.035578764 | -0.341718889 | 2.757837861  | ITGB1;ROCK2;ACTN1;CTNND1;GNAI3;MSN;PIK3R1;PIK3CB;F11R;CLDN1;MLLT4;ACTB;RAP1B;CDC42; CLDN4;PIK3CA;CTNNB1;PLCG1;EZR;VIL1                                                                                                                 |
| Choline metabolism in cancer_Homo sapiens_hsa05231                               | 18/101 | 0.000326078 | 0.001413004 | 0.007903554 | 0.034248736 | -0.356354411 | 2.860946693  | JUN;CHKA;SLC44A1;SLC44A2;PDPK1;PIK3R1;PIK3CB;FOS;WASL;HIF1A;EGFR;NRAS;MAPK8;PIK3CA;R PS6KB1;SP1;MAPK1;PLCG1                                                                                                                            |
| Steroid biosynthesis_Homo sapiens_hsa00100                                       | 6/20   | 0.000351231 | 0.001495761 | 0.004999134 | 0.02421149  | 3.634906049  | -28.91228017 | SQLE;SOAT1;SC5D;DHCR24;MSMO1;HSD17B7;LSS                                                                                                                                                                                               |
| Chagas disease (American trypanosomiasis)_Homo sapiens_hsa05142                  | 18/104 | 0.000471661 | 0.001974582 | 0.010181674 | 0.040562476 | -0.255905891 | 1.96004701   | SMAD2;JUN;CHUK;SERPINE1;GNAI3;PPP2R2A;PIK3R1;CFAR;PIK3CB;FOS;TGFBF1;TGFBF2;PPP2CB; MAPK8;PIK3CA;TRAF6;GNAS;MAPK1                                                                                                                       |
| Pathogenic Escherichia coli infection_Homo sapiens_hsa05130                      | 12/55  | 0.00048398  | 0.001992384 | 0.007565169 | 0.033367799 | 0.617894868  | -4.716680114 | CDC42;ITGB1;CTTN;ROCK2;CDH1;ARPC1A;CTNNB1;WASL;EZR;CLDN1;YWHAZ;ACTB                                                                                                                                                                    |
| Prolactin signaling pathway_Homo sapiens_hsa04917                                | 14/72  | 0.000591906 | 0.002396733 | 0.009660795 | 0.039118301 | 0.055957736  | -0.415887037 | GSK3B;SRC;PIK3CB;FOS;PIK3R1;FOXO3;NRAS;MAPK8;CCND2;PIK3CA;CCND1;MAPK1;S0C56;S0C55                                                                                                                                                      |
| Thyroid cancer_Homo sapiens_hsa05216                                             | 8/29   | 0.000821581 | 0.003273073 | 0.008921976 | 0.0367288   | 1.896541791  | -13.47356358 | NRAS;CCND1;CDH1;MYC;CCDC6;CTNNB1;MAPK1;BRAF                                                                                                                                                                                            |
| Insulin resistance_Homo sapiens_hsa04931                                         | 18/109 | 0.00083937  | 0.003290863 | 0.015114145 | 0.058331152 | -0.218042742 | 1.544366031  | MGEA5;GSK3B;PDPK1;INSR;GFPT1;SLC2A1;PTEN;PIK3R1;PIK3CB;PTPRF;PPP1CB;RPS6KA3;MAPK8;C REB1;PIK3CA;RPS6KB1;CREB3L2;OGT                                                                                                                    |
| Sphingolipid signaling pathway_Homo sapiens_hsa04071                             | 19/120 | 0.001033158 | 0.003926001 | 0.018296747 | 0.067747903 | -0.132865011 | 0.913464867  | CERS3;ASAHI1;ASAH2;CERS5;SGMS1;ROCK2;PDPK1;PTEN;GNAI3;PPP2R2A;PIK3R1;PIK3CB;PPP2CB;N RAS;SGPL1;MAPK8;PIK3CA;MAPK1;CTSD                                                                                                                 |
| Fc gamma R-mediated phagocytosis_Homo sapiens_hsa04666                           | 16/93  | 0.00101804  | 0.003926001 | 0.015592226 | 0.059250459 | -0.07238376  | 0.498715135  | MYO10;LIMK2;ARPC1A;PIK3CB;PIK3R1;WASL;CRKL;CDC42;MARCKS;PIK3CA;RPS6KB1;CFI2;MAPK1;PL CG1;CRK;ARF6                                                                                                                                      |
| T cell receptor signaling pathway_Homo sapiens_hsa04660                          | 17/104 | 0.001297847 | 0.004784598 | 0.01938008  | 0.070395291 | -0.055072504 | 0.366069628  | GSK3B;JUN;CHUK;PDPK1;CLB;PIK3R1;PIK3CB;FOS;CDC42;PPP3CA;NRAS;DLG1;PIK3CA;PAK6;MAPK1; PLCG1;PAK2                                                                                                                                        |
| VEGF signaling pathway_Homo sapiens_hsa04370                                     | 12/61  | 0.001283157 | 0.004784598 | 0.014808902 | 0.058060298 | 0.480669237  | -3.200534227 | CDC42;PPP3CA;NRAS;PIK3CA;SRC;MAPKAPK2;MAPK1;PIK3CB;PIK3R1;PLCG1;PTGS2;VEGFA                                                                                                                                                            |
| Osteoclast differentiation_Homo sapiens_hsa04380                                 | 20/132 | 0.00135099  | 0.004907274 | 0.023024077 | 0.081414528 | -0.130051061 | 0.859236607  | JUN;CHUK;PIK3R1;PIK3CB;FOS;TGFBF1;FOSL2;TGFBF2;IL1A;CYLD;PPP3CA;MAPK8;CREB1;PIK3CA;TR AF6;MAPK1;TAB2;SQSTM1;JUNB;IFNAR1                                                                                                                |
| Hepatitis C_Homo sapiens_hsa05160                                                | 20/133 | 0.001483934 | 0.005312053 | 0.024534224 | 0.084166017 | -0.093154981 | 0.606723867  | GSK3B;CDKN1A;CHUK;CD81;PDPK1;BRAF;PPP2R2A;PIK3R1;PIK3CB;CLDN1;EGFR;PPP2CB;NRAS;CLDN 4;MAPK8;PIK3CA;TRAF6;MAPK1;LDLR;IFNAR1                                                                                                             |
| Epstein-Barr virus infection_Homo sapiens_hsa05169                               | 27/202 | 0.001558921 | 0.005423287 | 0.034247317 | 0.114311991 | -0.218988687 | 1.415490661  | YWHAH;ATF2;GSK3B;CDKN1A;CDKN1B;YWHAH;TNFAIP3;PIK3R1;PIK3CB;MAPK8;MYC;PLCG1;YWHA G;MAP2K3;HSP89A;JUN;CHUK;YWHAZ;PIK3CA;NEDD4;TRAF6;CDK2;MDM2;TBP1;POLR3G;TAB2;CD4 4                                                                     |
| AMPK signaling pathway_Homo sapiens_hsa04152                                     | 19/124 | 0.001538745 | 0.005423287 | 0.02399309  | 0.083468917 | -0.026398908 | 0.170980134  | PFKFB2;CAB39;PDPK1;INSR;PPP2R2A;PIK3R1;PIK3CB;HMGR;FOXO3;IGF1R;RAP1B;PPP2CB;CREB1;C CND1;PIK3CA;RPS6KB1;RAB14;CREB3L2;ULK1                                                                                                             |
| Progesterone-mediated oocyte maturation_Homo sapiens_hsa04914                    | 16/98  | 0.001800252 | 0.006175864 | 0.023072943 | 0.081414528 | 0.04619024   | -0.291914403 | GNAI3;BRAF;PIK3R1;PIK3CB;CDC25A;ADCY6;CDC25B;IGF1R;RPS6KA3;MAPK8;PIK3CA;CDC27;CDK2;M APK1;CPEB2;CPEB4                                                                                                                                  |
| Measles_Homo sapiens_hsa05162                                                    | 20/136 | 0.001951458 | 0.006602878 | 0.029520067 | 0.099882965 | -0.041893382 | 0.261380289  | HSPA8;GSK3B;CDKN1B;CHUK;TNFRSF10B;MSN;TNFAIP3;CLB;PIK3R1;PIK3CB;JIL1;CCND3;CCND2;C DK6;CCND1;PIK3CA;TRAF6;CDK2;TAB2;IFNAR1                                                                                                             |
| Dorso-ventral axis formation_Homo sapiens_hsa04320                               | 7/27   | 0.002567854 | 0.008571079 | 0.018376961 | 0.067747903 | 2.822802699  | -16.83712848 | NOTCH2;NOTCH1;MAPK1;CPEB2;EGFR;ETS2;CPEB4                                                                                                                                                                                              |
| Wnt signaling pathway_Homo sapiens_hsa04310                                      | 20/142 | 0.003265917 | 0.010755574 | 0.041726875 | 0.133851145 | -0.000322469 | 0.00184588   | GSK3B;JUN;FBXW11;ROCK2;CSNK1A1;FZD6;CUL1;WNT7A;NLK;LRP6;VANGL1;PPP3CA;CCND3;MAPK 8;CCND2;CCND1;DAAM1;TLX1R1;MYC;CTNNB1                                                                                                                 |
| Oocyte meiosis_Homo sapiens_hsa04114                                             | 18/123 | 0.003373823 | 0.010964923 | 0.038994164 | 0.126731032 | 0.103271055  | -0.58778878  | YWHAH;FBXW11;YWHAH;CUL1;YWHAZ;ADCY6;IGF1R;PPP1CB;PPP3CA;PPP2CB;RPS6KA3;SLK;CDC27; CDK2;MAPK1;CPEB2;YWHAH;CPEB4                                                                                                                         |
| Chemokine signaling pathway_Homo sapiens_hsa04062                                | 24/187 | 0.004659459 | 0.014946575 | 0.062124819 | 0.187132076 | 0.043148137  | -0.231656136 | GSK3B;CHUK;ROCK2;SRC;GNAI3;BRAF;CXCL1;PPBP;PIK3R1;PIK3CB;WASL;FOXO3;GNG12;CXCL3;ADC Y6;CXCL5;CRKL;RAP1B;CDC42;TIAM1;NRAS;PIK3CA;MAPK1;CRK                                                                                              |
| Ubiquitin mediated proteolysis_Homo sapiens_hsa04120                             | 19/137 | 0.004836647 | 0.015122174 | 0.051957067 | 0.160417443 | 0.209970001  | -1.119462125 | UBE2H;MAP3K1;FBXW7;FBXW11;UBA6;HUWE1;CUL1;SYVN1;XIAP;UBE3A;CBLB;UBE2G1;UBE2Z;U BE2J1;TRAF6;NEDD4;CDC27;MDM2;UBE2K                                                                                                                      |
| Inositol phosphate metabolism_Homo sapiens_hsa00562                              | 12/71  | 0.004827325 | 0.015122174 | 0.037125343 | 0.122266131 | 0.737953492  | -3.935847496 | PIKFYVE;MTMR3;PIK3CA;SYN1;IMPAD1;JPMK;PTEN;PI4K2B;PIK3CB;PLCG1;MTMR4;PIK3C2A                                                                                                                                                           |
| Insulin signaling pathway_Homo sapiens_hsa04910                                  | 19/139 | 0.005664591 | 0.017489424 | 0.057741371 | 0.176075538 | 0.17046095   | -0.881883242 | GSK3B;PRKCI;PDPK1;INSR;CLB;BRAF;PIK3R1;PIK3CB;PTPRF;CRKL;PPP1CB;NRAS;MAPK8;PIK3CA;RPS 6KB1;PRKAR1A;MKNK2;MAPK1;CRK                                                                                                                     |
| NOD-like receptor signaling pathway_Homo sapiens_hsa04621                        | 10/57  | 0.007425736 | 0.02264391  | 0.045040862 | 0.14082396  | 1.370991519  | -6.721702045 | MAPK8;CHUK;TRAF6;TNFAIP3;TAB3;MAPK1;CXCL1;TAB2;NOD2;HSP90B1                                                                                                                                                                            |

|                                                                       |        |             |             |             |             |             |              |                                                                                                                                                |
|-----------------------------------------------------------------------|--------|-------------|-------------|-------------|-------------|-------------|--------------|------------------------------------------------------------------------------------------------------------------------------------------------|
| N-Glycan biosynthesis_Homo sapiens_hsa00510                           | 9/49   | 0.008017263 | 0.024149561 | 0.044989965 | 0.14082396  | 1.982903092 | -9.569803956 | GANAB;B4GALT1;RPN2;MAN1A2;MAN2A1;ALG2;MOGS;ALG11;MGAT2                                                                                         |
| Oxytocin signaling pathway_Homo sapiens_hsa04921                      | 20/158 | 0.010684994 | 0.031797513 | 0.09141489  | 0.243656351 | 0.172097532 | -0.78113606  | JUN;CDKN1A;PPP1R12A;ROCK2;SRC;GNAI3;PIK3R1;PIK3CB;FOS;PTGS2;EGFR;ADCY6;ACTB;PPP1CB;PPP3CA;NRAS;CCND1;PIK3CA;GNAS;MAPK1                         |
| Phosphatidylinositol signaling system_Homo sapiens_hsa04070           | 14/98  | 0.011153753 | 0.032797345 | 0.073040314 | 0.214773304 | 0.500781397 | -2.251502762 | MTMR3;IPMK;PTEN;PIK3R1;PIK3CB;MTMR4;PIK3C2A;PIKFYVE;SYNJ1;PIK3CA;IMPAD1;PIP4K2B;PLCG1;CD52                                                     |
| GnRH signaling pathway_Homo sapiens_hsa04912                          | 13/91  | 0.01414366  | 0.041099813 | 0.082001867 | 0.222576495 | 0.532211169 | -2.266415295 | MAP3K2;MAP2K3;JUN;MAP3K1;SRC;EGFR;ADCY6;CDC42;NRAS;MAPK8;GNAS;MAPK1;HBEGF                                                                      |
| Platelet activation_Homo sapiens_hsa04611                             | 16/122 | 0.015337686 | 0.04405126  | 0.098888852 | 0.257111016 | 0.326723739 | -1.36486959  | ITGB1;PRKCJ;ARHGEF12;PPP1R12A;ROCK2;SRC;GNAI3;PIK3R1;PIK3CB;ADCY6;ACTB;PPP1CB;RAP1B;PIK3CA;GNAS;MAPK1                                          |
| B cell receptor signaling pathway_Homo sapiens_hsa04662               | 11/73  | 0.015845859 | 0.04498767  | 0.080513993 | 0.222576495 | 0.898462064 | -3.723987838 | GSK3B;PPP3CA;JUN;NRAS;PIK3CA;CHUK;CD81;MAPK1;PIK3CB;FOS;PIK3R1                                                                                 |
| Phagosome_Homo sapiens_hsa04145                                       | 19/154 | 0.016246236 | 0.045600232 | 0.115603057 | 0.294370672 | 0.381930088 | -1.573511481 | ITGB1;RAB5C;TRFC;M6PR;THBS1;ACTB;EEA1;SEC61A2;DYNC1L1;PIKFYVE;LAMP1;CTSL;LAMP2;CANX;ATP6V1B2;OLR1;ITGAV;ITGA5;VAMP3                            |
| Longevity regulating pathway - multiple species_Homo sapiens_hsa04213 | 10/64  | 0.016481814 | 0.045741665 | 0.078652417 | 0.221095035 | 1.321294289 | -5.424570618 | HSPA8;NRAS;PIK3CA;RPS6KB1;INSR;PIK3CB;PIK3R1;FOXO3;ADCY6;IGF1R                                                                                 |
| cAMP signaling pathway_Homo sapiens_hsa04024                          | 23/199 | 0.018307779 | 0.049216248 | 0.143389634 | 0.350665738 | 0.381743898 | -1.527139448 | JUN;PPP1R12A;ROCK2;GNAI3;RRAS2;BRAF;ATP1B3;PIK3R1;ADRB2;FOS;PIK3CB;ATP2B1;MLLT4;ADCY6;RAP1B;PPP1CB;TIAM1;MAPK8;CREB1;PIK3CA;CREB3L2;GNAS;MAPK1 |
| cGMP-PKG signaling pathway_Homo sapiens_hsa04022                      | 20/167 | 0.018775269 | 0.049216248 | 0.131604825 | 0.328347393 | 0.423302444 | -1.682718114 | MEF2A;ATF2;PPP1R12A;ROCK2;INSR;GNAI3;ATP1B3;PIK3R1;PIK3CB;ADRB2;ATP2B1;ADCY6;PPP1CB;PPP3CA;CREB1;PIK3CA;CREB3L2;PIF;MAPK1;MEF2D                |
| Longevity regulating pathway - mammal_Homo sapiens_hsa04211           | 13/94  | 0.018201484 | 0.049216248 | 0.097428494 | 0.256008915 | 0.664505737 | -2.662177548 | ATF2;INSR;PIK3CB;PIK3R1;FOXO3;ADCY6;IGF1R;NRAS;CREB1;PIK3CA;RPS6KB1;CREB3L2;JLKI1                                                              |
| Pertussis_Homo sapiens_hsa05133                                       | 11/75  | 0.019128582 | 0.049216248 | 0.091741055 | 0.243656351 | 1.320935809 | -5.226377134 | ITGB1;JL1A;JUN;MAPK8;CFL2;TRAF6;GNAI3;MAPK1;ITGA5;FOS;CXCL5                                                                                    |
| Regulation of lipolysis in adipocytes_Homo sapiens_hsa04923           | 9/56   | 0.018794875 | 0.049216248 | 0.081828727 | 0.222576495 | 1.65820651  | -6.589996284 | PIK3CA;INSR;GNAS;GNAI3;PIK3CB;ADRB2;PIK3R1;PTGS2;ADCY6                                                                                         |
| Sphingolipid metabolism_Homo sapiens_hsa00600                         | 8/47   | 0.018870542 | 0.049216248 | 0.077736163 | 0.221095035 | 2.828823498 | -11.23086264 | CERS3;UGCC;ASAHI;SGPL1;CERS6;ASAH2;SGMS1;KDSR                                                                                                  |
| Circadian rhythm_Homo sapiens_hsa04710                                | 6/30   | 0.019098123 | 0.049216248 | 0.070020506 | 0.208374277 | 5.423005362 | -21.46515113 | CREB1;FBXW11;CUL1;FBXL3;CSNK1D;CLOCK                                                                                                           |
